# Supplementary material for: Personal Exposure to Black Carbon, Particulate Matter and Nitrogen Dioxide in the Paris Region Measured by Portable Sensors Worn by Volunteers
Source: MDPI journal article supplement (doi:10.3390/toxics10010033), 2022-01-11
Supplement: s1 [file s1]

# Supplementary Materials: Personal Exposure to BC, PM and NO<sub>2</sub> in the Paris Region Measured by Portable Sensors Worn by Volunteers

Baptiste Languille, Valérie Gros, Bonnaire Nicolas, Cécile Honoré, Anne Kaufmann and Karine Zeitouni

## S1. IPI Results for BC, NO<sub>2</sub> and PM Sensors.

**Table S1.1.** IPI results for the AE51 (BC sensors) from the spring assessment campaign. Mean: mean concentration (ng·m<sup>-3</sup>); Match: match score; RMSE: root mean squared error (ng·m<sup>-3</sup>); *r*: Pearson correlation coefficient; *t*: Kendall correlation coefficient; *S*: Spearman correlation coefficient; Pres: presence parameter; LFE: low frequencies energy parameter; IPI: integrated performance index.

|    | #  | Mean | Match | RMSE | <i>r</i> | <i>t</i> | <i>S</i> | Pres | LFE  | IPI  |
|----|----|------|-------|------|----------|----------|----------|------|------|------|
| BC | A1 | 1001 | 0.84  | 334  | 0.79     | 0.57     | 0.74     | 0.99 | 0.98 | 0.80 |
|    | A2 | 976  | 0.86  | 302  | 0.82     | 0.61     | 0.79     | 0.99 | 0.98 | 0.82 |
|    | A3 | 1023 | 0.85  | 320  | 0.82     | 0.62     | 0.80     | 0.99 | 0.99 | 0.82 |
|    | A4 | 1054 | 0.83  | 378  | 0.80     | 0.58     | 0.75     | 0.95 | 0.98 | 0.79 |
|    | A5 | 1035 | 0.83  | 397  | 0.75     | 0.54     | 0.72     | 0.98 | 0.97 | 0.77 |
|    | A6 | 1020 | 0.87  | 307  | 0.84     | 0.65     | 0.83     | 0.99 | 0.99 | 0.84 |

**Table S1.2.** IPI results for the Cairnsens (NO<sub>2</sub> sensors). Mean: mean concentration (ppb); Match: match score; RMSE: root mean squared error (ppb); *r*: Pearson correlation coefficient; *t*: Kendall correlation coefficient; *S*: Spearman correlation coefficient; Pres: presence parameter; LFE: low frequencies energy parameter; IPI: integrated performance index.

|                 | #   | Mean | Match | RMSE | <i>r</i> | <i>t</i> | <i>S</i> | Pres | LFE  | IPI  |
|-----------------|-----|------|-------|------|----------|----------|----------|------|------|------|
| NO <sub>2</sub> | C1  | 49   | 0.65  | 19   | 0.76     | 0.58     | 0.75     | 1.00 | 0.99 | 0.76 |
|                 | C2  | 39   | 0.62  | 13   | 0.78     | 0.59     | 0.77     | 1.00 | 0.99 | 0.77 |
|                 | C3  | 44   | 0.55  | 16   | 0.75     | 0.57     | 0.75     | 1.00 | 0.98 | 0.75 |
|                 | C4  | 48   | 0.57  | 17   | 0.75     | 0.56     | 0.73     | 1.00 | 1.00 | 0.75 |
|                 | C5  | 37   | 0.68  | 14   | 0.75     | 0.57     | 0.75     | 0.94 | 0.99 | 0.76 |
|                 | C6  | 44   | 0.60  | 15   | 0.77     | 0.57     | 0.75     | 1.00 | 0.99 | 0.76 |
|                 | C7  | 45   | 0.68  | 14   | 0.76     | 0.57     | 0.74     | 1.00 | 1.00 | 0.78 |
|                 | C8  | 40   | 0.62  | 13   | 0.75     | 0.56     | 0.73     | 1.00 | 0.99 | 0.76 |
|                 | C9  | 34   | 0.67  | 15   | 0.73     | 0.55     | 0.71     | 1.00 | 0.99 | 0.75 |
|                 | C10 | 38   | 0.65  | 13   | 0.76     | 0.57     | 0.74     | 1.00 | 0.99 | 0.77 |
|                 | C11 | 33   | 0.65  | 14   | 0.75     | 0.57     | 0.74     | 1.00 | 0.99 | 0.76 |
|                 | C12 | 38   | 0.64  | 13   | 0.78     | 0.59     | 0.76     | 1.00 | 0.99 | 0.77 |
|                 | C13 | 40   | 0.68  | 13   | 0.78     | 0.59     | 0.77     | 1.00 | 0.99 | 0.78 |
|                 | C14 | 39   | 0.69  | 12   | 0.79     | 0.60     | 0.77     | 1.00 | 0.99 | 0.79 |
|                 | C15 | 36   | 0.68  | 13   | 0.78     | 0.59     | 0.76     | 1.00 | 0.99 | 0.78 |

**Table S1.3.** IPI results for the Canarin (PM<sub>2.5</sub> sensors) from the spring assessment campaign. Mean: mean concentration ( $\mu\text{g}\cdot\text{m}^{-3}$ ); Match: match score; RMSE: root mean squared error ( $\mu\text{g}\cdot\text{m}^{-3}$ );  $r$ : Pearson correlation coefficient;  $t$ : Kendall correlation coefficient;  $S$ : Spearman correlation coefficient; Pres: presence parameter; LFE: low frequencies energy parameter; IPI: integrated performance index.

|                   | #   | Mean | Match | RMSE | $r$  | $t$  | $S$  | Pres | LFE  | IPI   |
|-------------------|-----|------|-------|------|------|------|------|------|------|-------|
| PM <sub>2.5</sub> | F1  | 17   | 0.23  | 7    | 0.88 | 0.74 | 0.89 | 0.79 | 1.00 | 0.73  |
|                   | F2  | 16   | 0.29  | 7    | 0.84 | 0.70 | 0.86 | 0.80 | 1.00 | 0.72  |
|                   | F3  | 16   | 0.38  | 6    | 0.86 | 0.72 | 0.87 | 0.81 | 1.00 | 0.75  |
|                   | F4  | 16   | 0.27  | 7    | 0.87 | 0.74 | 0.89 | 0.80 | 1.00 | 0.74  |
|                   | F5  | 15   | 0.26  | 6    | 0.76 | 0.60 | 0.78 | 0.81 | 1.00 | 0.68  |
|                   | F6  | 15   | 0.70  | 5    | 0.84 | 0.69 | 0.84 | 0.62 | 1.00 | 0.76  |
|                   | F7  | 1    | 0.16  | 10   | 0.00 | 0.06 | 0.08 | 0.72 | 0.88 | −1.10 |
|                   | F8  | 16   | 0.28  | 6    | 0.86 | 0.71 | 0.87 | 0.80 | 1.00 | 0.73  |
|                   | F9  | 15   | 0.19  | 6    | 0.86 | 0.71 | 0.86 | 0.77 | 1.00 | 0.72  |
|                   | F10 | 14   | 0.24  | 5    | 0.80 | 0.65 | 0.81 | 0.81 | 1.00 | 0.70  |
|                   | F11 | 14   | 0.25  | 5    | 0.86 | 0.73 | 0.88 | 0.72 | 1.00 | 0.73  |
|                   | F12 | 14   | 0.35  | 5    | 0.87 | 0.73 | 0.87 | 0.79 | 1.00 | 0.75  |
|                   | F13 | 15   | 0.28  | 5    | 0.86 | 0.71 | 0.86 | 0.79 | 1.00 | 0.73  |
|                   | F14 | 16   | 0.27  | 8    | 0.73 | 0.68 | 0.84 | 0.78 | 1.00 | 0.69  |

## S2. Sensor Distribution and Association with Volunteer

**Table S2.1.** Sensor distribution among volunteers during the spring campaign. The sensors are identified by their serial number. \* : volunteers that participated to several campaigns. - : sensor used but for which data was corrupted or unusable.

| Volunteer | AE51 | Cairsens | Canarin |
|-----------|------|----------|---------|
| AA        |      | -        | 7       |
| AB        |      | -        | 15      |
| AC*       |      | -        | 10      |
| AD*       | 1241 | 3975     | 6       |
| AE        |      | -        | 16      |
| AF        |      | -        | 5       |
| AG        | 1248 | -        | 9       |
| AH        | 0114 | 3971     | 1       |
| AI*       |      | 3954     | 3       |
| AJ        |      | 3977     | -       |
| AK        |      | 3974     | 14      |
| AL        |      | 3978     | 17      |
| AM        | 1242 | 3983     | 4       |
| AN        |      | -        | 2       |
| AO        | 1247 | -        | -       |
| AP        |      | -        | 12      |

**Table S2.2.** Sensor distribution among volunteers during the autumn campaign. The sensors are identified by their serial number.

| Volunteer | AE51 | Cairsens | Canarin |
|-----------|------|----------|---------|
| AC*       |      | 3749     | 9       |
| AD*       | 1241 | 3975     | 6       |
| AI        |      | 3983     | 5       |
| AQ        | 1242 | 3978     | 7       |
| AR        |      | 3755     | 14      |
| AS        | 1244 | 3754     | 2       |
| AT        |      | 3756     | 13      |
| AU        | 1247 | 3750     | 8       |
| AV        | 0114 | 3972     | 10      |
| AW        |      | 3971     | 4       |
| AX        |      | 3970     | 17      |
| AY        |      | 3977     | 11      |
| AZ        | 1248 | 3982     | 15      |
| BA        |      | 3974     | 16      |
| BB        |      | 3979     | 3       |

**Table S2.3.** Sensor distribution among volunteers during the winter campaign. The sensors are identified by their serial number.

| Volunteer | AE51 | Cairsens | Canarin |
|-----------|------|----------|---------|
| BD        | 0114 | 3983     | 5       |
| BE        | 0114 | 3983     | 3       |
| BF        | 0114 | 3983     | 3       |
| BG        | 0114 | 3983     | 3       |
| BH        | 0114 | 3983     | 3       |
| BI        | 0114 | 3983     | 3       |

### S3. Environment Contribution to PE.

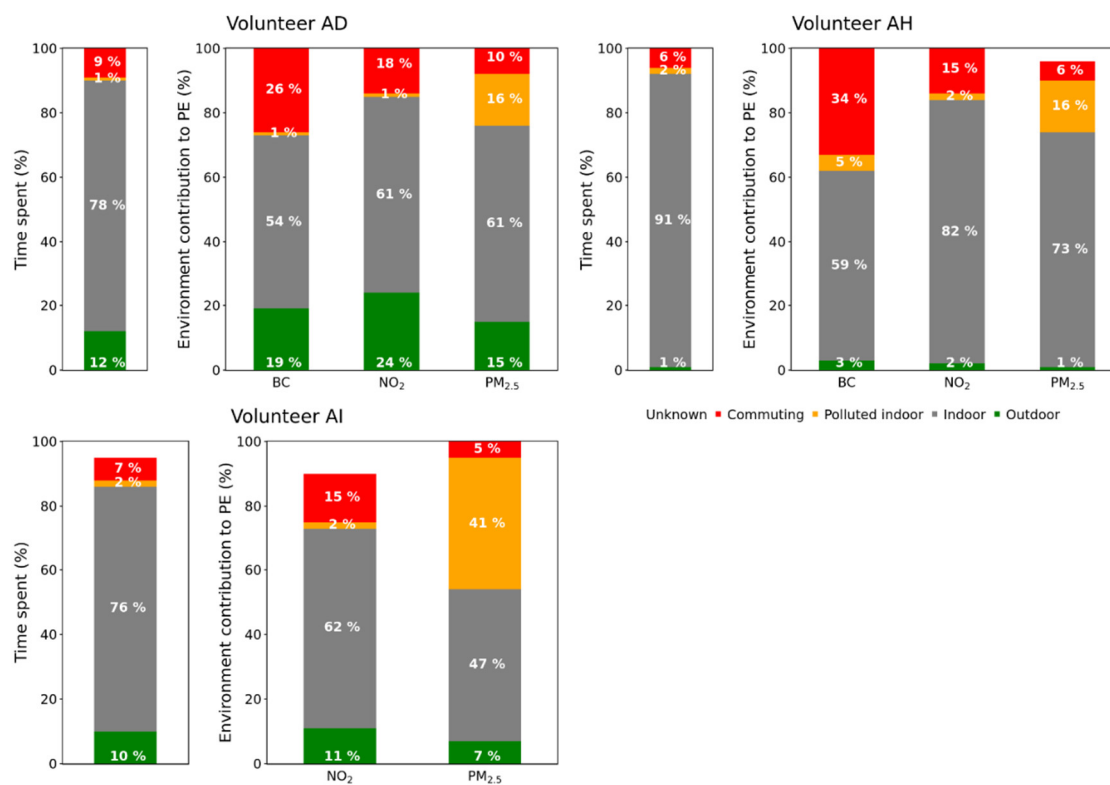

**Figure S1.** Environment contribution to PE for volunteers AD, AH and AI during the spring campaign.

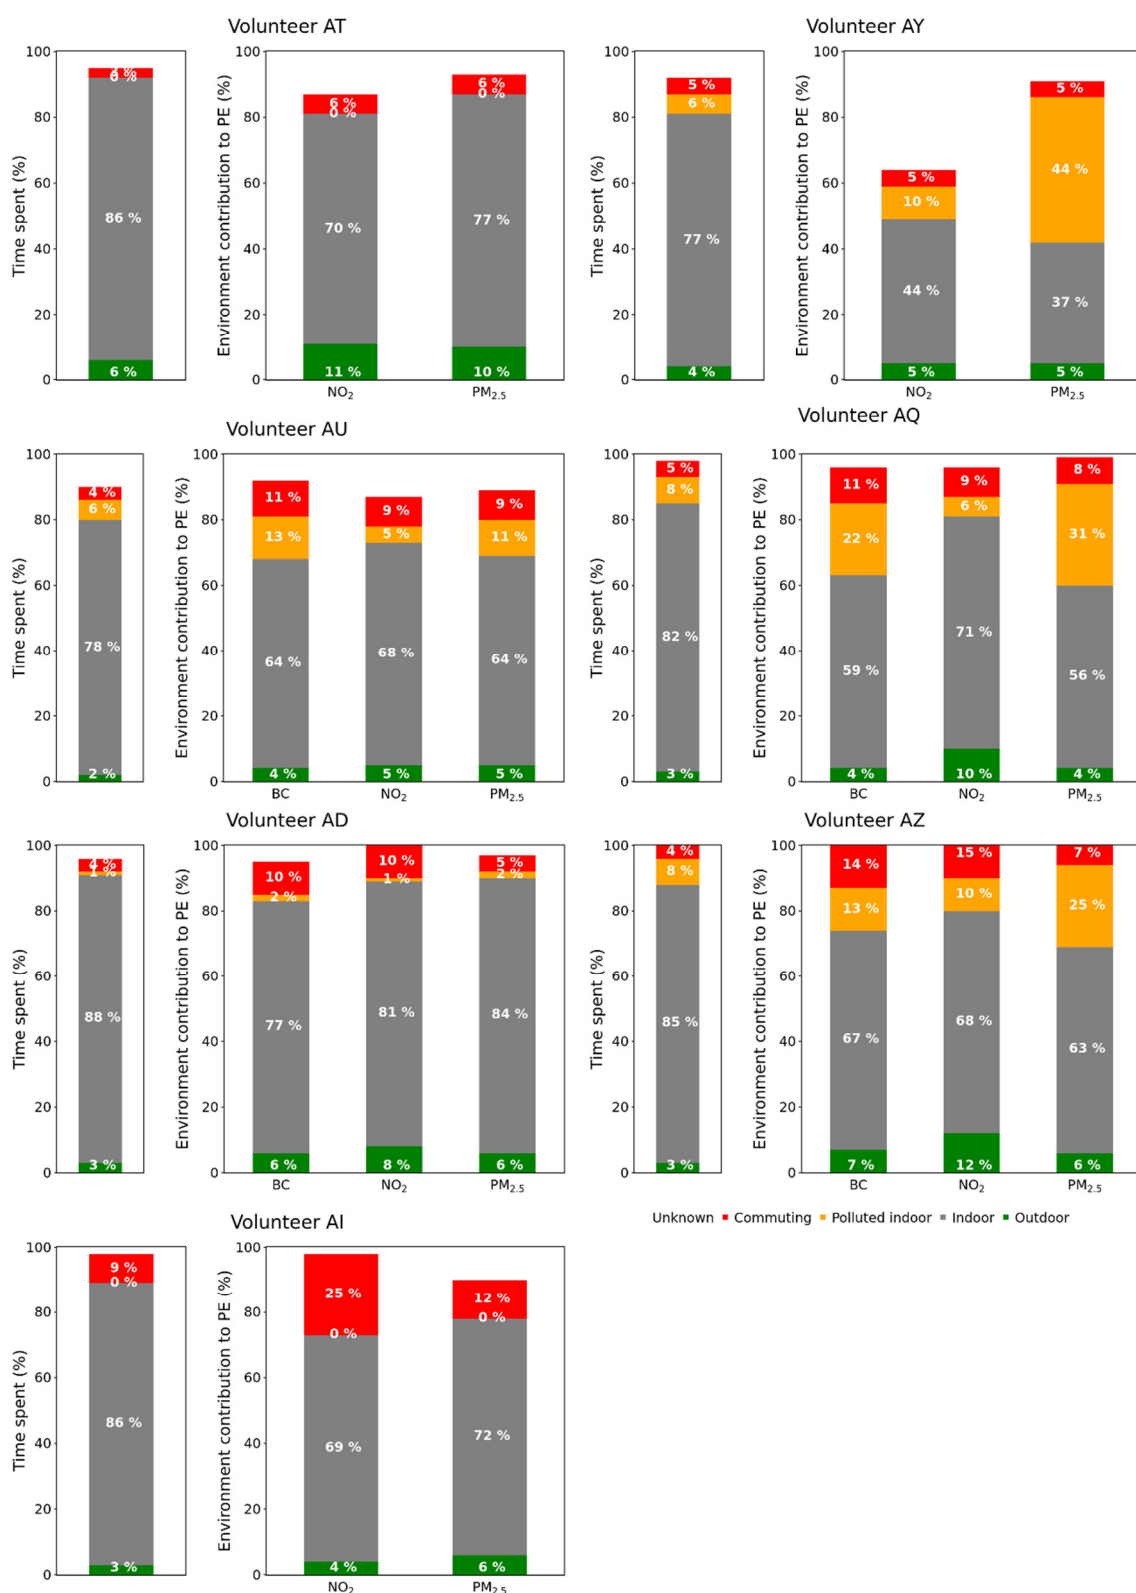

**Figure S2.** Environment contribution to PE for volunteers AT, AY, AU, AQ, AD, AZ and AI during the autumn campaign.



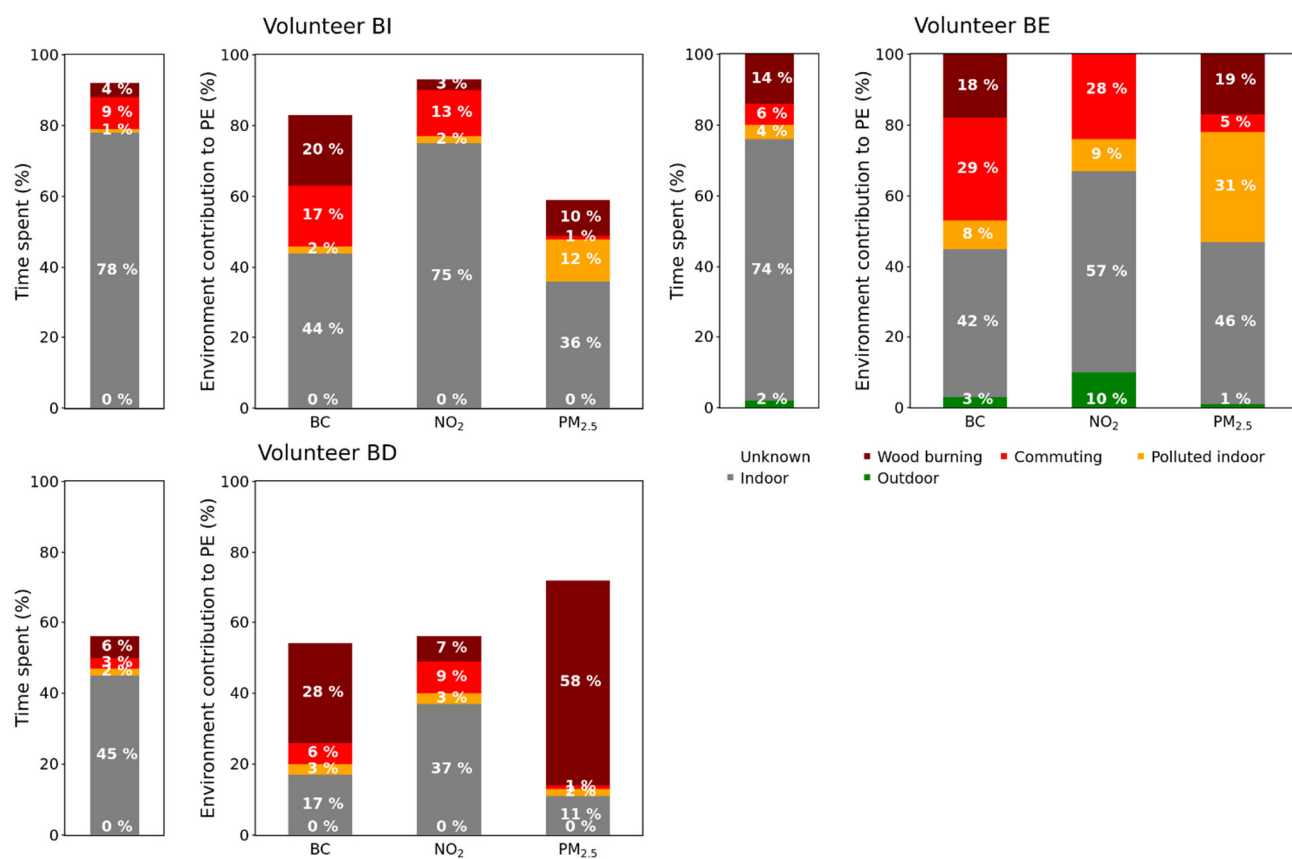

**Figure S3.** Environment contribution to PE for volunteers BI, BE and BD during the winter campaign.

#### 4. Correlation Matrices and Scatter plots between PE Measured by Sensors and Urban Background Concentrations Monitored by Fixed Stations for Each Campaign for the 1-h Averaged Data Set.

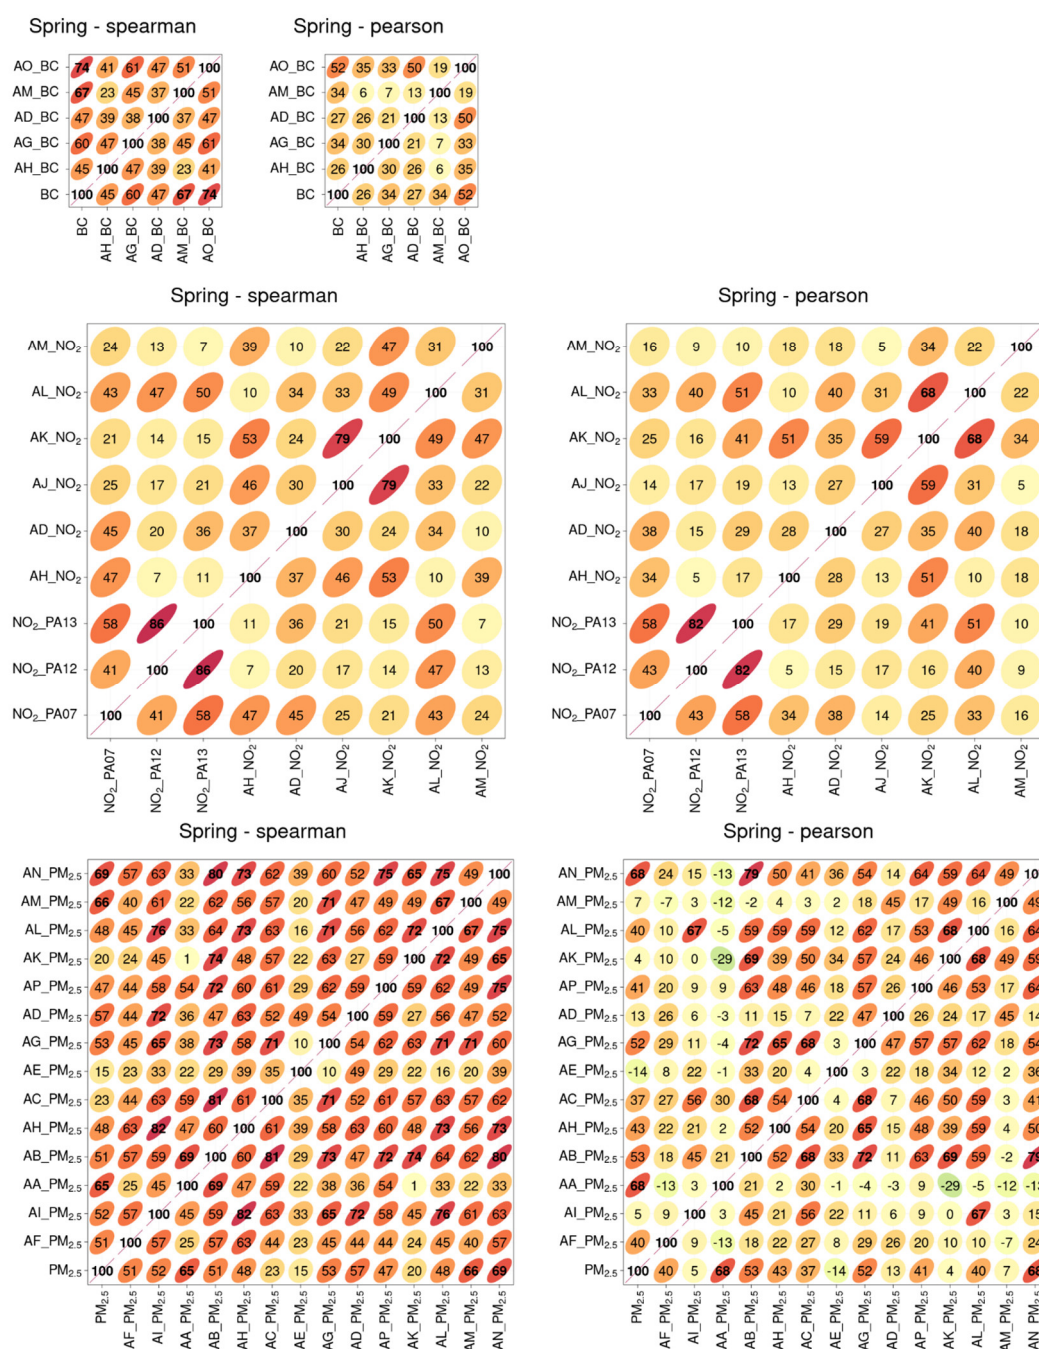

**Figure S4.** Correlation matrices between PE measured by sensors and urban background concentrations monitored by fixed stations for the spring campaign (1-h averaged data set).

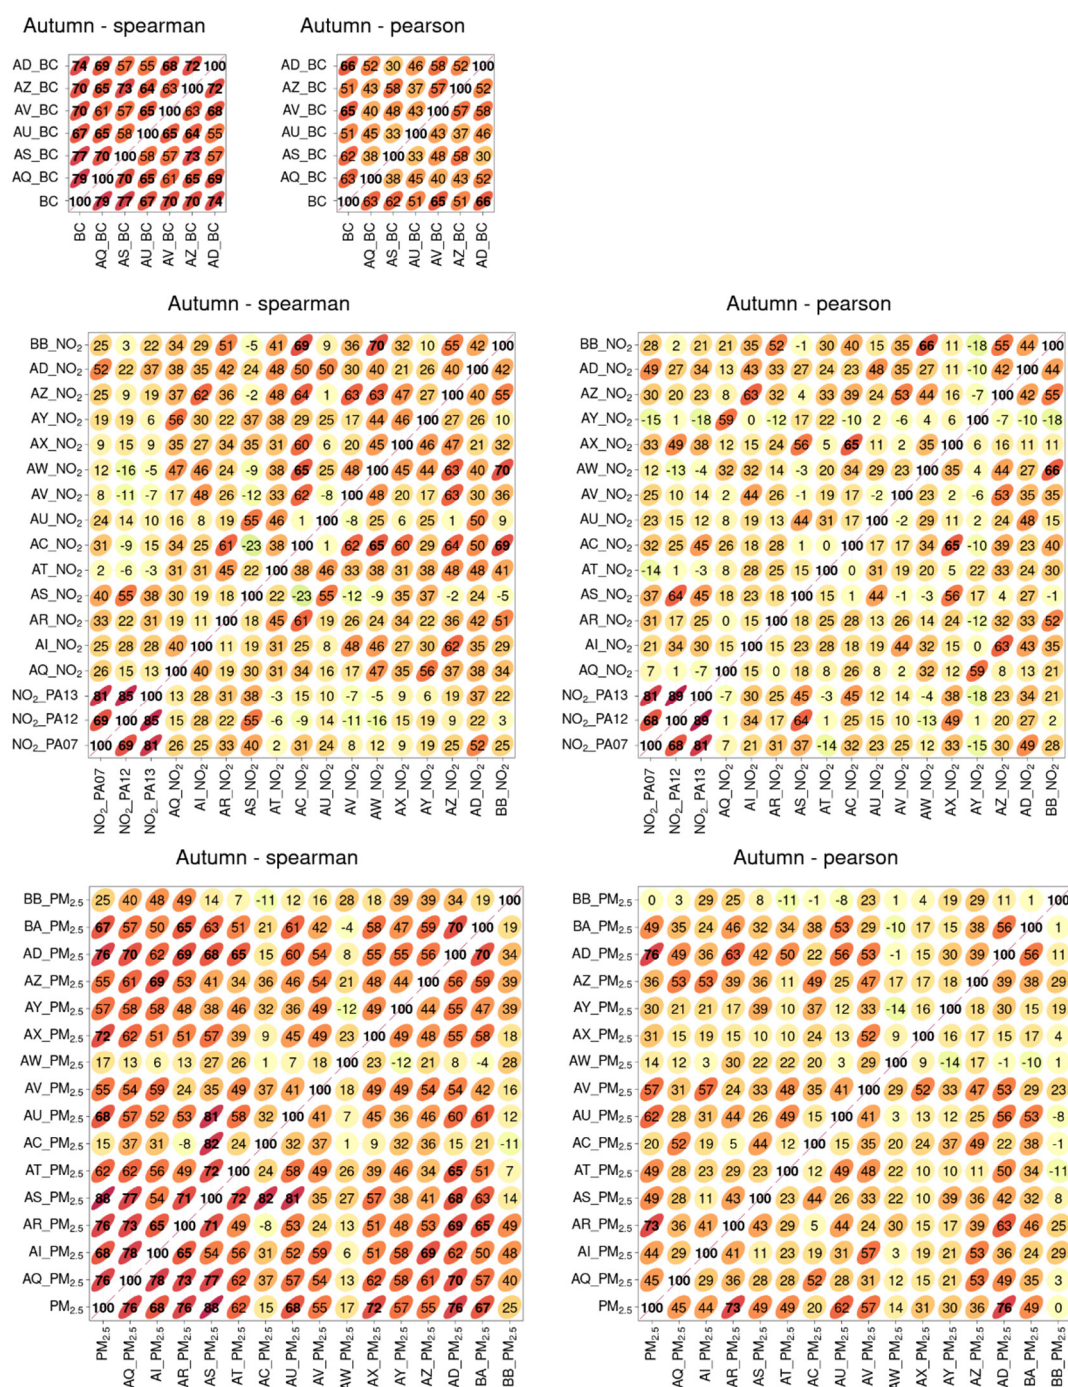

**Figure S5.** Correlation matrices between PE measured by sensors and urban background concentrations monitored by fixed stations for the autumn campaign (1-h averaged data set).



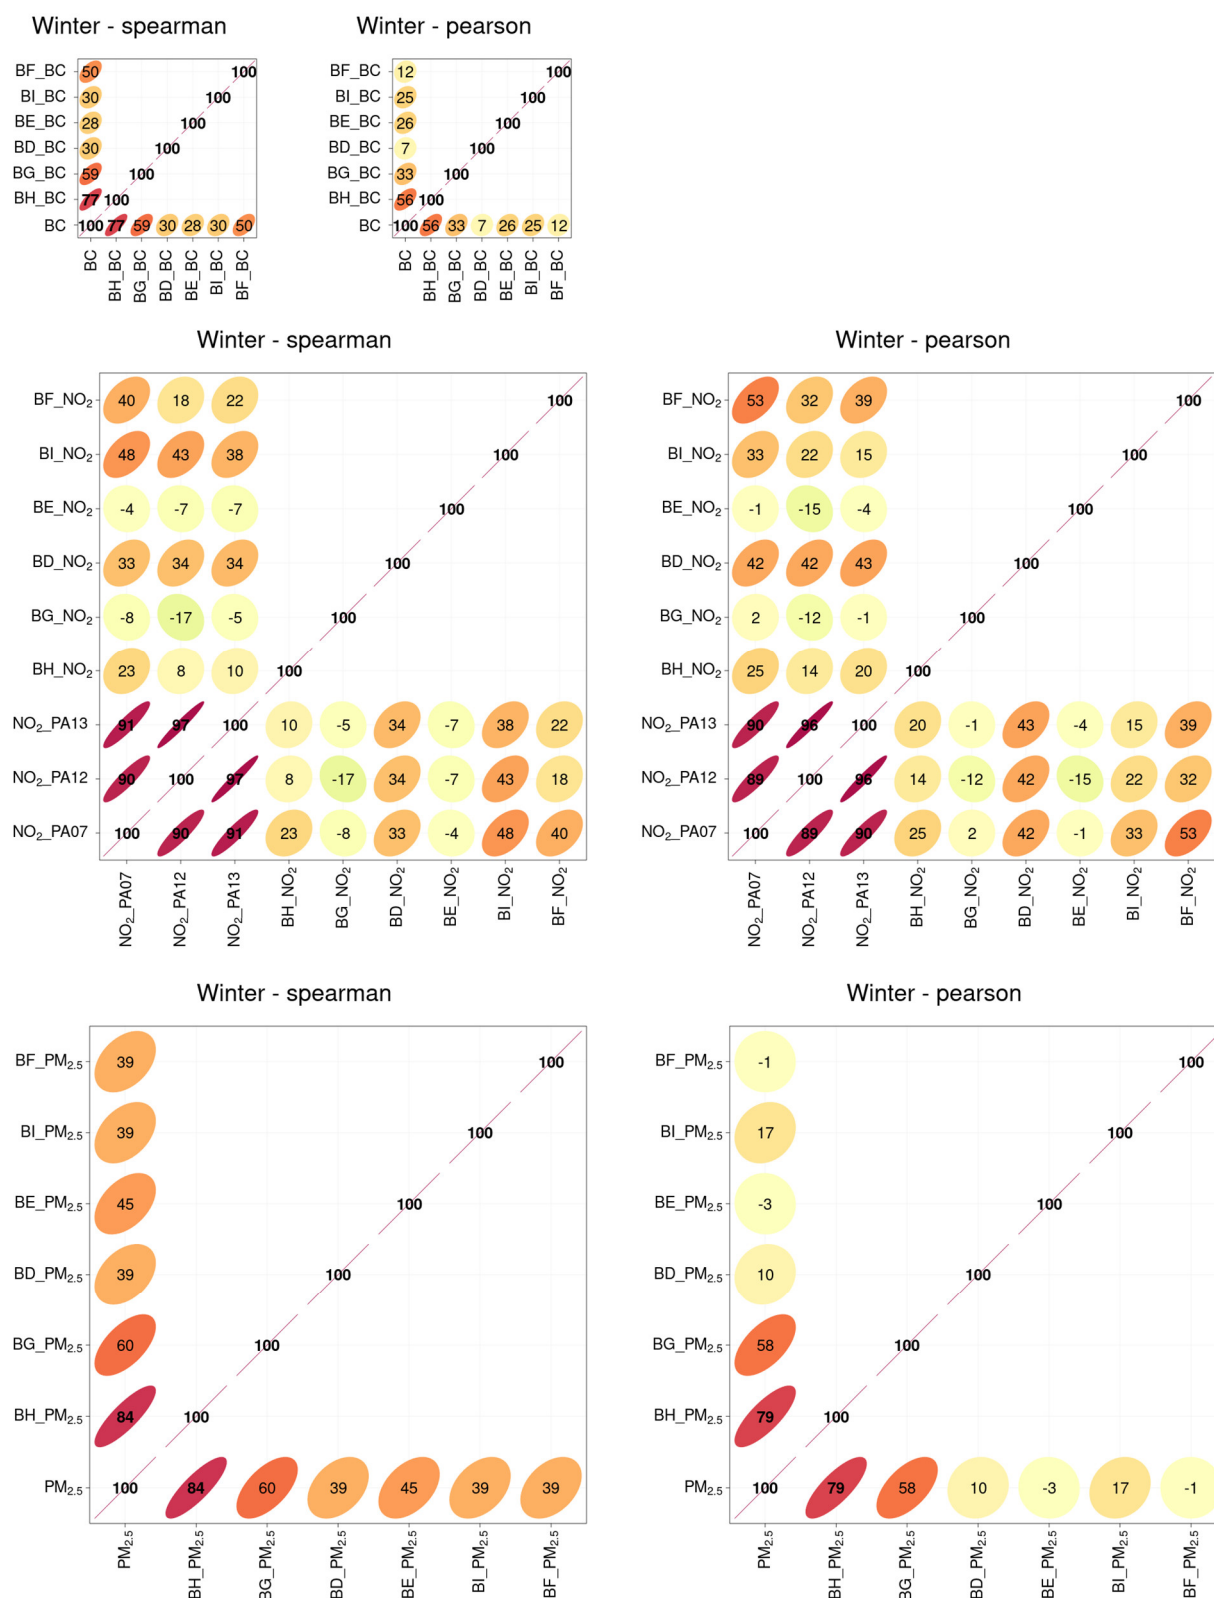

**Figure S6.** Correlation matrices between PE measured by sensors and urban background concentrations monitored by fixed stations for the winter campaign (1-h averaged data set).
